# Supplementary material
Source: PubMed Central journal article supplement (PMC3536081)
Supplement: AEM.02632-12_zam999103990so1.pdf [file AEM.02632-12_zam999103990so1.pdf]

Supplementary figure 1. Concatenated phylogenetic tree of *Bartonella* type isolates and representative isolate of this study, based on fragments of 5 genes: *gltA*, *ftsZ*, *groEl*, *rpoB*, *ribC* (1701 bp in total), generated using Maximum Likelihood algorithm in PhyML with a GTR substitution model (1000 replicates, bootstrap values indicated at the nodes).

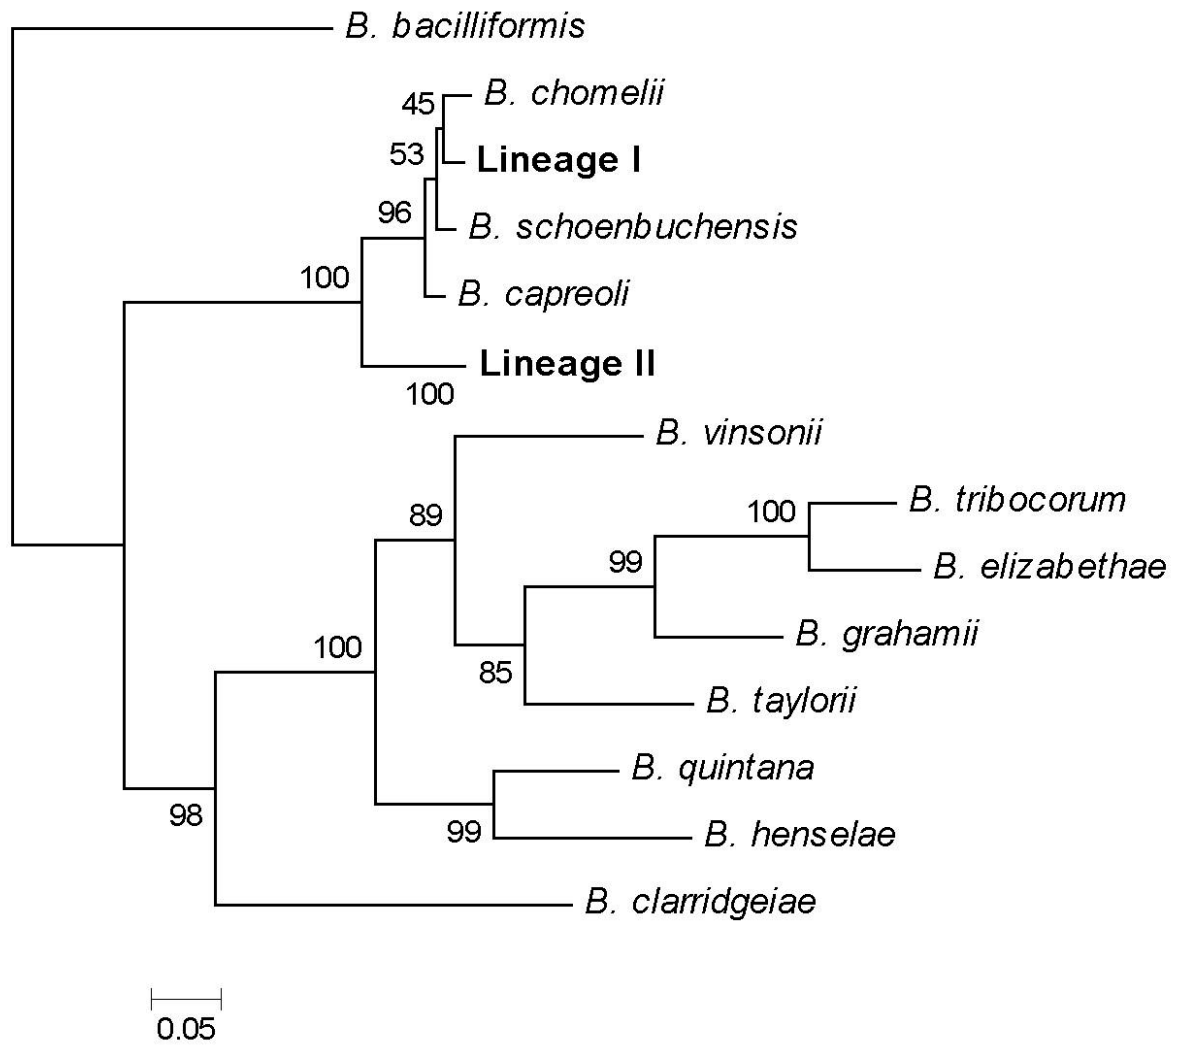

Supplementary table 1. Homology (%) of a) *ftsZ* (427 bp), b) *rpoB* (257 bp), c) *gltA* (239 bp), d) *ribC* (332 bp) and *groEl* (434 bp) gene fragments between samples analysed in this study from lineage 1 and lineage 2, and type isolates of bartonellae infecting ruminants in 5 different *loci*.

a)

|                           | Lineage I | Lineage II | <i>B. schoenbuchensis</i> | <i>B. capreoli</i> | <i>B. chomeli</i> |
|---------------------------|-----------|------------|---------------------------|--------------------|-------------------|
| Lineage II                | 94.6      |            |                           |                    |                   |
| <i>B. schoenbuchensis</i> | 98.1      | 94.6       |                           |                    |                   |
| <i>B. capreoli</i>        | 97.9      | 95.3       | 97.4                      |                    |                   |
| <i>B. chomeli</i>         | 98.8      | 95.1       | 97.9                      | 98.1               |                   |
| <i>B. melophagi</i>       | 98.1      | 95.6       | 97.7                      | 98.4               | 98.4              |

b)

|                           | Lineage I | Lineage II | <i>B. schoenbuchensis</i> | <i>B. capreoli</i> | <i>B. chomeli</i> | <i>B. melophagi</i> |
|---------------------------|-----------|------------|---------------------------|--------------------|-------------------|---------------------|
| Lineage II                | 96.5      |            |                           |                    |                   |                     |
| <i>B. schoenbuchensis</i> | 98.8      | 97.7       |                           |                    |                   |                     |
| <i>B. capreoli</i>        | 98.8      | 97.7       | 100                       |                    |                   |                     |
| <i>B. chomeli</i>         | 98.1      | 96.9       | 99.2                      | 99.2               |                   |                     |
| <i>B. melophagi</i>       | 96.9      | 97.7       | 98.1                      | 98.1               | 97.3              |                     |
| <i>B. bovis</i>           | 95.7      | 98.4       | 96.9                      | 96.7               | 96.1              | 96.5                |

c)

|                           | Lineage I | Lineage II | <i>B. schoenbuchensis</i> | <i>B. capreoli</i> | <i>B. chomeli</i> | <i>B. melophagi</i> |
|---------------------------|-----------|------------|---------------------------|--------------------|-------------------|---------------------|
| Lineage II                | 96.2      |            |                           |                    |                   |                     |
| <i>B. schoenbuchensis</i> | 98.7      | 95.8       |                           |                    |                   |                     |
| <i>B. capreoli</i>        | 96.7      | 95.4       | 97.1                      |                    |                   |                     |
| <i>B. chomeli</i>         | 99.1      | 96.2       | 99.6                      | 96.7               |                   |                     |
| <i>B. melophagi</i>       | 98.3      | 96.7       | 98.7                      | 98.3               | 98.3              |                     |
| <i>B. bovis</i>           | 95.4      | 97.9       | 94.1                      | 94.6               | 94.6              | 94.6                |

d)

|                           | Lineage I | Lineage II | <i>B. schoenbuchensis</i> | <i>B. capreoli</i> | <i>B. chomeli</i> | <i>B. melophagi</i> |
|---------------------------|-----------|------------|---------------------------|--------------------|-------------------|---------------------|
| Lineage II                | 93.4      |            |                           |                    |                   |                     |
| <i>B. schoenbuchensis</i> | 98.8      | 91.9       |                           |                    |                   |                     |
| <i>B. capreoli</i>        | 98.8      | 91.9       | 99.4                      |                    |                   |                     |
| <i>B. chomeli</i>         | 98.5      | 92.5       | 98.5                      | 98.5               |                   |                     |
| <i>B. melophagi</i>       | 97.0      | 91.9       | 96.7                      | 96.7               | 96.7              |                     |
| <i>B. bovis</i>           | 92.2      | 95.5       | 91.3                      | 91.3               | 91.6              | 90.7                |

e)

|                           | Lineage I | Lineage II | <i>B. schoenbuchensis</i> | <i>B. capreoli</i> |
|---------------------------|-----------|------------|---------------------------|--------------------|
| Lineage II                | 97.2      |            |                           |                    |
| <i>B. schoenbuchensis</i> | 99.5      | 97.2       |                           |                    |
| <i>B. capreoli</i>        | 99.8      | 97.0       | 99.8                      |                    |
| <i>B. chomeli</i>         | 99.1      | 96.3       | 98.6                      | 98.8               |
